# Supplementary material for: CH 4 and N 2 O dynamics in the boreal forest–mire ecotone
Source: Copernicus journal article supplement (doi:10.5194/bg-12-281-2015), 2015-01-16
Supplement: Supplementary file 1 [file bg-12-281-2015-supplement.pdf]

Supplement of Biogeosciences, 12, 281–297, 2015  
<http://www.biogeosciences.net/12/281/2015/>  
doi:10.5194/bg-12-281-2015-supplement  
© Author(s) 2015. CC Attribution 3.0 License.

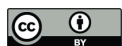

*Supplement of*

## **CH<sub>4</sub> and N<sub>2</sub>O dynamics in the boreal forest–mire ecotone**

**B. Āupek et al.**

*Correspondence to:* B. Āupek (boris.tupek@helsinki.fi)

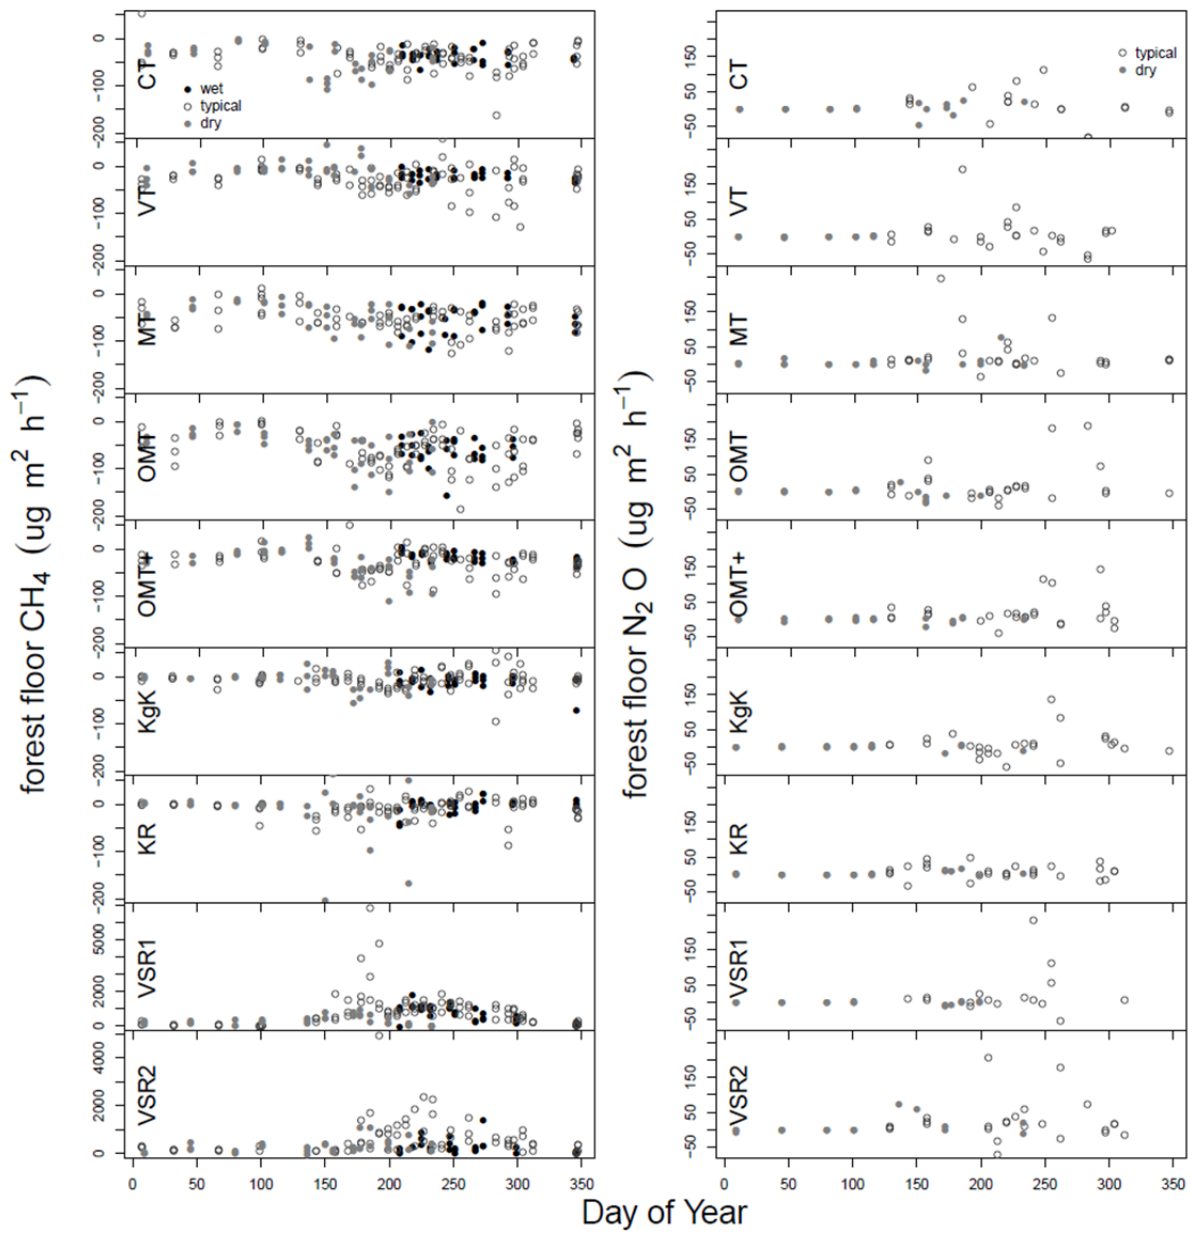

1  
2  
3  
4  
5  
6  
7

Supplement Figure 3. The momentary forest floor gas fluxes ( $\mu\text{g m}^{-2} \text{ h}^{-1}$ ) of a) CH<sub>4</sub> and b) N<sub>2</sub>O in forest/mire types (uplands CT, VT, MT, OMT, transitions OMT+, KgK, KR, and mires VSR1, VSR2) as measured during the years with exceptional moisture (wet, typical, and dry). The top-down arrangement of sites mimics the locations on the slope (see Fig. 1).
